# Supplementary material for: Genome Wide Scan to Identify Potential Genomic Regions Associated With Milk Protein and Minerals in Vrindavani Cattle
Source: Front Vet Sci. 2022 Mar 10;9:760364. doi: 10.3389/fvets.2022.760364 (PMC8960298; doi:10.3389/fvets.2022.760364)
Supplement: Supplementary file 1 [file Table_1.XLSX]

## Sheet: TableS1
Table S1: Functional enrichment of candiadte genes in DAVID 6.8
Annotation Cluster 1	Enrichment Score: 1.671297789265235
Category	Term	Count	%	PValue	Genes	List Total	Pop Hits	Pop Total	Fold Enrichment	Bonferroni	FDR
GOTERM_MF_DIRECT	GO:0005248: Voltage-gated sodium channel activity	5	7.69231	0.000258295	KCNQ3, SCN7A, CACNA1S, CACNG3, SCN1A	65	86	17808	15.9284	0.0255021	0.0258295
GOTERM_BP_DIRECT	GO:0086010~membrane depolarization during action potential	3	4.61538	0.00456381	SCN7A, CACNA1S, SCN1A	51	28	13824	29.042	0.67839	1
INTERPRO	IPR005821:Ion transport domain	4	6.15385	0.00633834	KCNQ3, SCN7A, CACNA1S, SCN1A	63	102	16802	10.4588	0.731851	1
UP_KEYWORDS	Ion channel	5	7.69231	0.00859261	KCNQ3, SCN7A, CACNA1S, CACNG3, SCN1A	65	224	17808	6.11538	0.578095	0.281236
KEGG_PATHWAY	bta04261:Adrenergic signaling in cardiomyocytes	4	6.15385	0.0109792	PPP2R2C, SCN7A, CACNA1S, CACNG3	27	136	7550	8.2244	0.533152	0.757563
UP_KEYWORDS	Ion transport	6	9.23077	0.0121152	SLC6A15, KCNQ3, SCN7A, CACNA1S, CACNG3, SCN1A	65	383	17808	4.29195	0.704449	0.281236
UP_KEYWORDS	Sodium transport	3	4.61538	0.0172861	SLC6A15, SCN7A, SCN1A	65	56	17808	14.6769	0.825132	0.281236
INTERPRO	IPR027359:Voltage-dependent potassium channel, four helix bundle domain	3	4.61538	0.0175489	SCN7A, CACNA1S, SCN1A	63	55	16802	14.5472	0.974393	1
UP_KEYWORDS	Sodium	3	4.61538	0.0196865	SLC6A15, SCN7A, SCN1A	65	60	17808	13.6985	0.863071	0.281236
UP_KEYWORDS	Transport	6	9.23077	0.346417	SLC6A15, KCNQ3, SCN7A, CACNA1S, CACNG3, SCN1A	65	1079	17808	1.52346	1	1
UP_SEQ_FEATURE	transmembrane region	4	6.15385	0.699576	SLC6A15, KCNQ3, CXCR4, CACNG3	18	1269	6267	1.09745	1	1
GOTERM_CC_DIRECT	GO:0005886~plasma membrane	8	12.3077	0.711921	CRB1, RASA1, EPB41L3, CDH13, SCN7A, CXCR4, CACNA1S, SCN1A	56	2261	15461	0.976875	1	1
Annotation Cluster 2	Enrichment Score: 1.1145624506278695
Category	Term	Count	%	PValue	Genes	List Total	Pop Hits	Pop Total	Fold Enrichment	Bonferroni	FDR
INTERPRO	IPR018097:EGF-like calcium-binding, conserved site	3	4.61538	0.041018	CRB1, VCAN, EDIL3	63	87	16802	9.1965	0.999828	1
INTERPRO	IPR000152:EGF-type aspartate/asparagine hydroxylation site	3	4.61538	0.0436068	CRB1, VCAN, EDIL3	63	90	16802	8.88995	0.999902	1
GOTERM_MF_DIRECT	GO:0005509~calcium ion binding	6	9.23077	0.0568946	CRB1, VCAN, CDH4, EDEM1, CDH13, EDIL3	49	571	13095	2.80818	0.994866	1
INTERPRO	IPR001881:EGF-like calcium-binding	3	4.61538	0.063308	CRB1, VCAN, EDIL3	63	111	16802	7.20807	0.999999	1
SMART	SM00179:EGF_CA	3	4.61538	0.0654051	CRB1, VCAN, EDIL3	34	111	8740	6.94754	0.978839	0.745618
UP_KEYWORDS	EGF-like domain	3	4.61538	0.0859457	CRB1, VCAN, EDIL3	65	136	17808	6.04344	0.999875	0.853845
SMART	SM00181:EGF	3	4.61538	0.116802	CRB1, VCAN, EDIL3	34	156	8740	4.94344	0.999158	0.951103
INTERPRO	IPR013032:EGF-like, conserved site	3	4.61538	0.133823	CRB1, VCAN, EDIL3	63	173	16802	4.62483	1	1
INTERPRO	IPR000742:Epidermal growth factor-like domain	3	4.61538	0.164461	CRB1, VCAN, EDIL3	63	197	16802	4.0614	1	1
Annotation Cluster 3	Enrichment Score: 0.7092594602386373
Category	Term	Count	%	PValue	Genes	List Total	Pop Hits	Pop Total	Fold Enrichment	Bonferroni	FDR
INTERPRO	IPR015943:WD40/YVTN repeat-like-containing domain	4	6.15385	0.102765	PPP2R2C, ATG16L1, DENND3, PLXNA4	63	305	16802	3.49768	1	1
INTERPRO	IPR001680:WD40 repeat	3	4.61538	0.228661	PPP2R2C, ATG16L1, DENND3	63	245	16802	3.26569	1	1
SMART	SM00320:WD40	3	4.61538	0.231991	PPP2R2C, ATG16L1, DENND3	34	242	8740	3.18668	1	1
INTERPRO	IPR017986:WD40-repeat-containing domain	3	4.61538	0.266964	PPP2R2C, ATG16L1, DENND3	63	273	16802	2.93075	1	1
Annotation Cluster 4	Enrichment Score: 0.44386425511466066
Category	Term	Count	%	PValue	Genes	List Total	Pop Hits	Pop Total	Fold Enrichment	Bonferroni	FDR
UP_SEQ_FEATURE	glycosylation site:N-linked (GlcNAc...)	6	9.23077	0.11628	VCAN, SLC6A15, CDH13, CXCR4, INHBB, HAPLN1	18	988	6267	2.11437	0.999943	1
UP_KEYWORDS	Disulfide bond	10	15.3846	0.132371	CRB1, VCAN, CMC2, CXCR4, LRP3, INHBB, EDIL3, INSL5, HAPLN1, PLXNA4	65	1643	17808	1.66749	0.999999	1
UP_SEQ_FEATURE	disulfide bond	4	6.15385	0.395633	VCAN, CXCR4, INHBB, HAPLN1	18	830	6267	1.67791	1	1
UP_KEYWORDS	Glycoprotein	6	9.23077	0.40304	VCAN, SLC6A15, CDH13, CXCR4, INHBB, HAPLN1	65	1157	17808	1.42076	1	1
UP_KEYWORDS	Secreted	4	6.15385	0.609487	VCAN, INHBB, INSL5, HAPLN1	65	868	17808	1.26253	1	1
GOTERM_CC_DIRECT	GO:0005615~extracellular space	4	6.15385	0.665262	VCAN, VWC2L, CDH13, INHBB	56	950	15461	1.16248	1	1
UP_SEQ_FEATURE	signal peptide	3	4.61538	0.785334	VCAN, CDH13, INHBB	18	1010	6267	1.03416	1	1
Annotation Cluster 5	Enrichment Score: 0.28335753548523923
Category	Term	Count	%	PValue	Genes	List Total	Pop Hits	Pop Total	Fold Enrichment	Bonferroni	FDR
UP_KEYWORDS	ATP-binding	5	7.69231	0.363655	ZAP70, ABCD3, ACTR1B, YTHDC2, NAT10	65	848	17808	1.61538	1	1
UP_KEYWORDS	Nucleotide-binding	5	7.69231	0.581139	ZAP70, ABCD3, ACTR1B, YTHDC2, NAT10	65	1124	17808	1.21872	1	1
GOTERM_MF_DIRECT	GO:0005524~ATP binding	5	7.69231	0.668279	ZAP70, ABCD3, ACTR1B, YTHDC2, NAT10	49	1224	13095	1.09169	1	1
Annotation Cluster 6	Enrichment Score: 0.2793703126979071
Category	Term	Count	%	PValue	Genes	List Total	Pop Hits	Pop Total	Fold Enrichment	Bonferroni	FDR
UP_KEYWORDS	Transmembrane helix	20	30.7692	0.407757	DPP10, CRB1, ABCD3, UGT1A1, SLC6A15, CXCR4, LRP3, DHCR24, MANBAL, CDH4, DPY19L3, KCNQ3, SCN7A, NAALAD2, SLC38A8, CACNA1S, CACNG3, ST3GAL1, PLXNA4, SCN1A	65	4935	17808	1.11031	1	1
UP_KEYWORDS	Transmembrane	20	30.7692	0.414857	DPP10, CRB1, ABCD3, UGT1A1, SLC6A15, CXCR4, LRP3, DHCR24, MANBAL, CDH4, DPY19L3, KCNQ3, SCN7A, NAALAD2, SLC38A8, CACNA1S, CACNG3, ST3GAL1, PLXNA4, SCN1A	65	4953	17808	1.10628	1	1
UP_KEYWORDS	Membrane	22	33.8462	0.472649	DPP10, CRB1, ABCD3, UGT1A1, SLC6A15, CXCR4, LRP3, DHCR24, MANBAL, CDH4, DPY19L3, KCNQ3, CDH13, SCN7A, NAALAD2, SLC38A8, CACNA1S, FBXL2, CACNG3, ST3GAL1, PLXNA4, SCN1A	65	5650	17808	1.06678	1	1
GOTERM_CC_DIRECT	GO:0016021~integral component of membrane	11	16.9231	0.954287	DPP10, CRB1, ABCD3, DPY19L3, KCNQ3, CXCR4, NAALAD2, LRP3, DHCR24, SLC38A8, MANBAL	56	4185	15461	0.725683	1	1
